# Supplementary material for: Assembly of a novel biosynthetic pathway for gentamicin B production in Micromonospora echinospora
Source: PubMed Central journal article supplement (PMC4700567; doi:10.1186/s12934-015-0402-6), 2016-01-05

**Additional file 1: Figure S1.** Schematic representation and confirmation of recombination strains. (A) Gene disruption of *genK* and *genP* (B) Expression of *kanJ* and *kanK* by site specific intergration. (C) Expression of *kanJ* and *kanK* with the promoter *PermE\** (D) Expression of *kanJ* and *kanK* with the native promoter of *genP* (E) Expression of *kanJ* and *kanK* with promoter *PhrdB*.

Figure S1 Schematic representation and confirmation of recombination strains. (A) Gene disruption of *genK* and *genP*

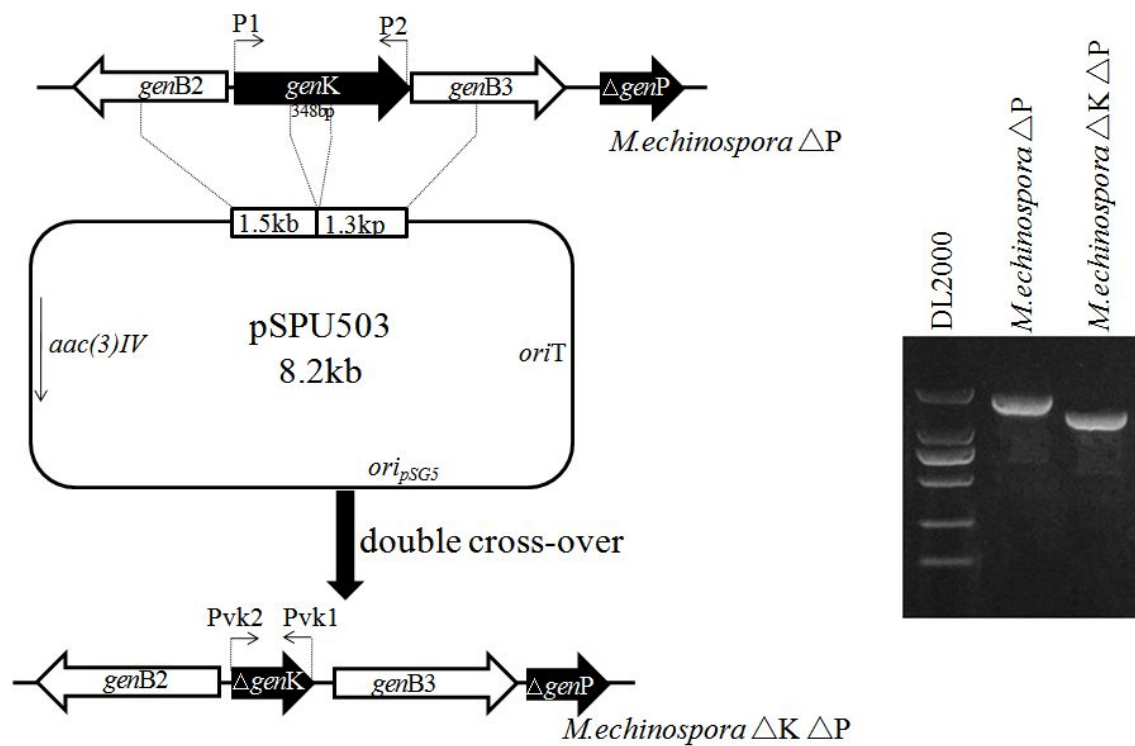

Figure S1 Schematic representation and confirmation of recombination strains. (B)

Expression of *kanJ* and *kanK* by site specific intergration.

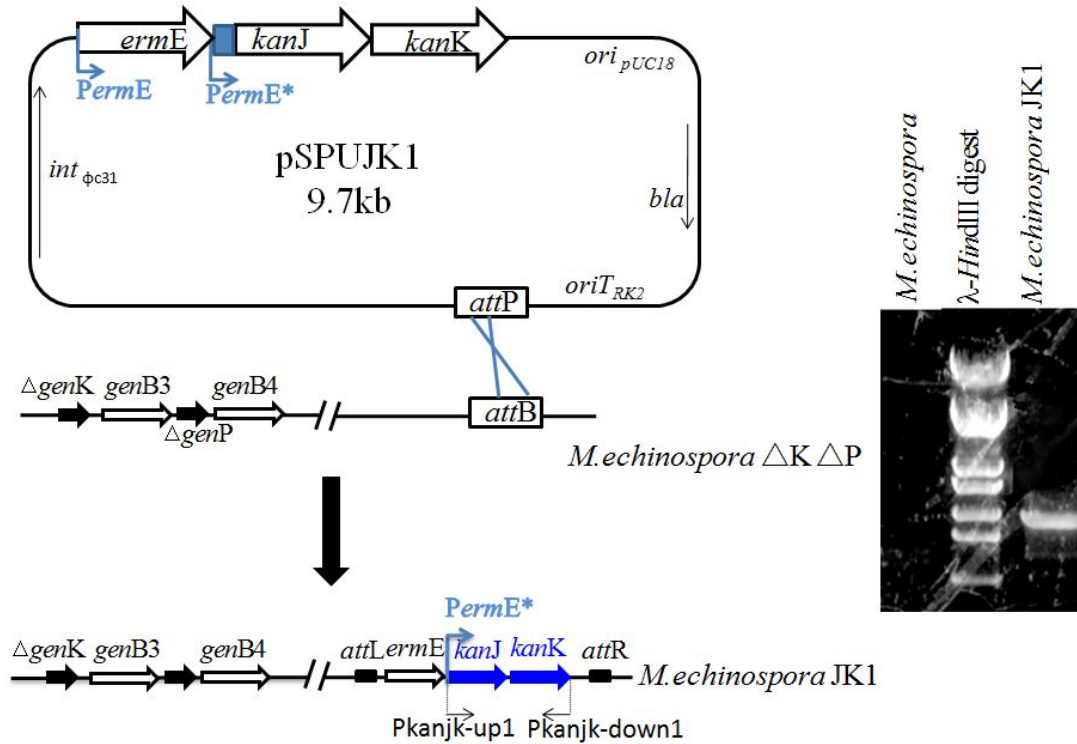

Figure S1 Schematic representation and confirmation of recombination strains. (C)

Expression of *kanJ* and *kanK* with the promoter *Perme\**.

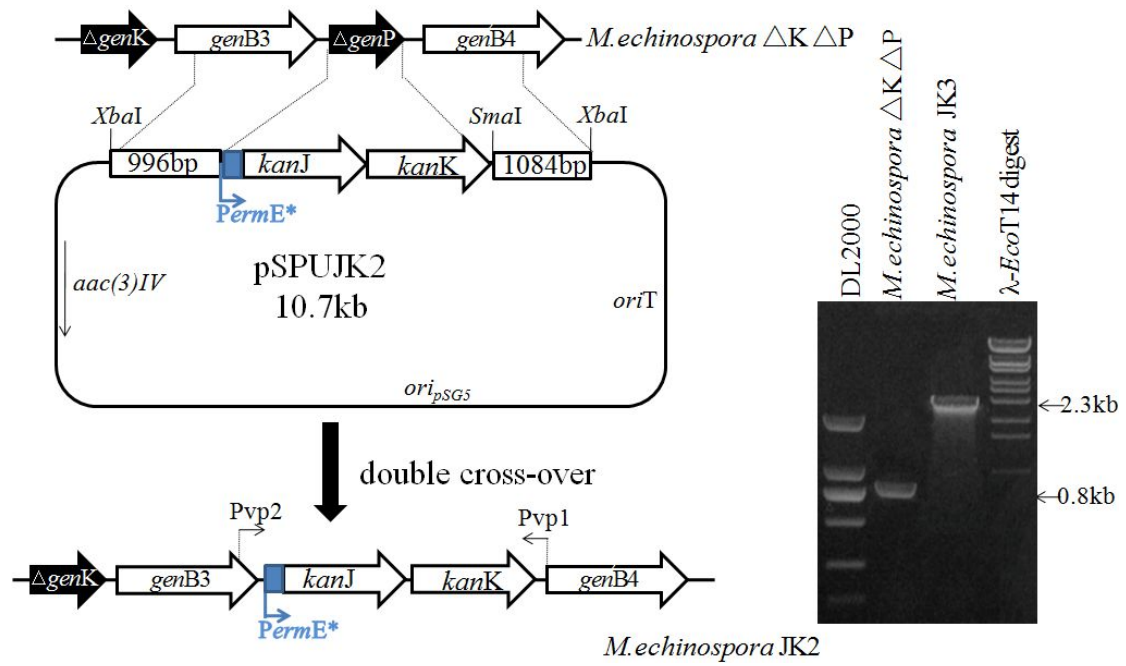

Figure S1 Schematic representation and confirmation of recombination strains. (D)  
 Expression of *kanJ* and *kanK* with the native promoter of *genP*.

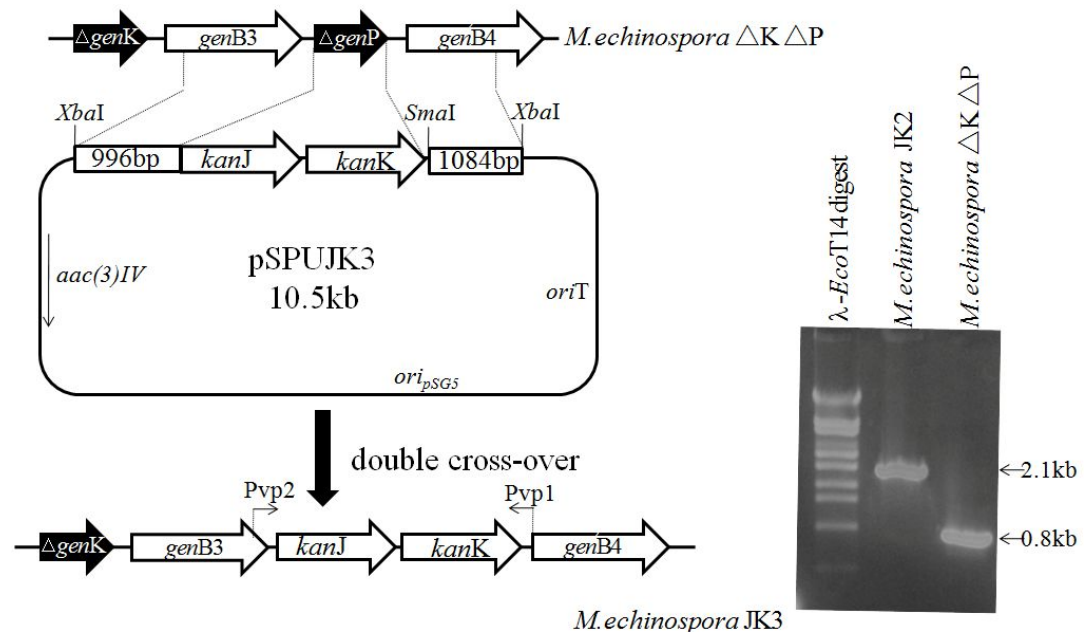

Figure S1 Schematic representation and confirmation of recombination strains. (E)

Expression of *kanJ* and *kanK* with promoter *PhrdB*.

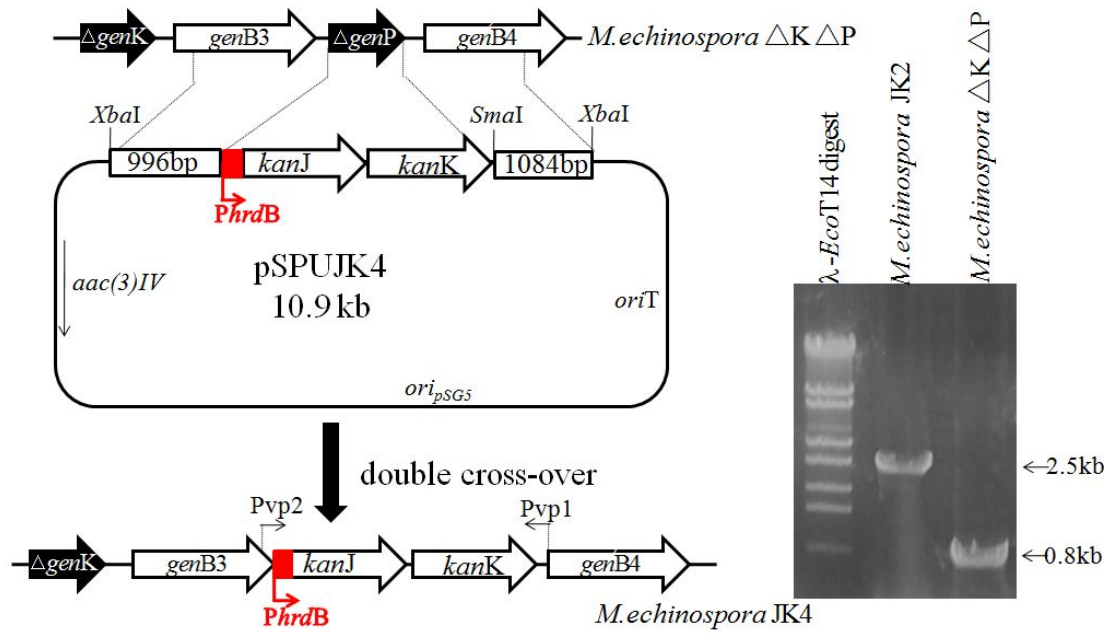

Supplement: 12934_2015_402_MOESM1_ESM.pdf [file 12934_2015_402_MOESM1_ESM.pdf]
