# Supplementary material for: Assembly of a novel biosynthetic pathway for gentamicin B production in Micromonospora echinospora
Source: PubMed Central journal article supplement (PMC4700567; doi:10.1186/s12934-015-0402-6), 2016-01-05

**Additional file 2: Figure S2.**  $^1\text{H}$  NMR spectrum of the new compound from *kanJK* expression strains.

**Figure S2**  $^1\text{H}$  NMR spectrum of the new compound from *kanJK* expression strains.

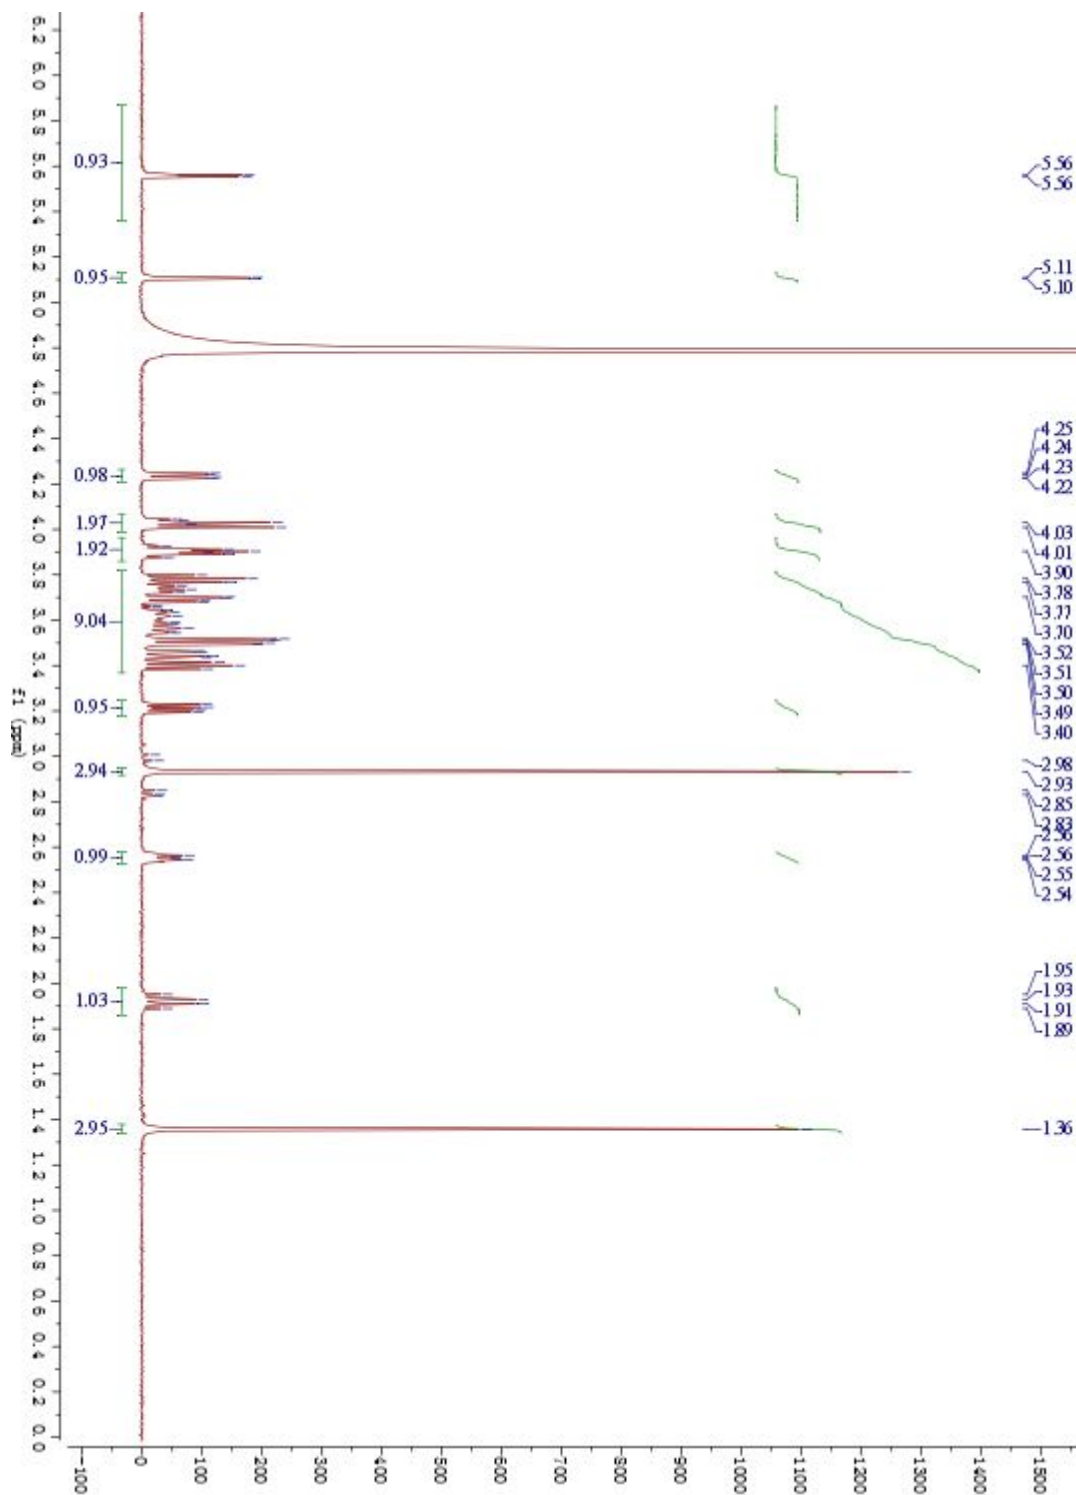

Supplement: 12934_2015_402_MOESM2_ESM.pdf [file 12934_2015_402_MOESM2_ESM.pdf]
