# Supplementary material for: Assembly of a novel biosynthetic pathway for gentamicin B production in Micromonospora echinospora
Source: PubMed Central journal article supplement (PMC4700567; doi:10.1186/s12934-015-0402-6), 2016-01-05
Supplement: 12934_2015_402_MOESM3_ESM.pdf [file 12934_2015_402_MOESM3_ESM.pdf]

**Additional file 3: Table S1.** Sequence of primers used in this study.

| Primers      | Sequence                                            |
|--------------|-----------------------------------------------------|
| Ph1          | 5'-GCTCTAGATGCGCCGTCTTGTAGATCTCC-3'                 |
| Ph2          | 5'-TCCCCCGGGCGGCGACCGACGCCGG-3'                     |
| Ph3          | 5'-CGGACACTCGCATGGACGTCCTTACCGGCCCTGTCGTTC-3'       |
| Ph4          | 5'-GCTCTAGAGCTGGCACGAGTGGCAGTTGGCG-3'               |
| Ph33         | 5'-GGGCGGAGCGGCAAGGGCCATCTTACCGGCCCTGTCGTTC-3'      |
| Ph34         | CGTTCCGGCGGAAGGCGGAATTCCTTACCGGCCCTGTCGTTC          |
| Pkanjk-up1   | 5'-TTTGATCCAGCGATGGCCCTTGCCGCTCC-3'                 |
| Pkanjk-down1 | 5'-GCGAAGCTTCATCGGCCGAAATCACACCAG-3'                |
| Pkanjk-up2   | 5'-CCGGTTGGTAGGATCCAGCGATGGCCCTTGCCGCTCCGCCC-3'     |
| Pkanjk-down2 | 5'-TCCCCGGGTCCAGTCACACCAGCCCTGGCGCGGTG-3'           |
| Pkanjk-up3   | 5'-GAACGACAGGGCCGGTGAAGATGGCCCTTGCCGCTCCGCCC-3'     |
| Pkanjk-up4   | 5'-CAACGTTCCGAGAGGTTGTCCATGGATGGCCCTTGCCGCTCCGCC-3' |
| Perm-down    | 5'-GGGCGGAGCGGCAAGGGCCATCGCTGGATCCTACCAACCGG-3'     |
| Perm-up      | 5'-GAACGACAGGGCCGGTGAAGGACGTCCATGCGAGTGTCCG-3'      |
| PhrdB-up     | 5'-GAACGACAGGGCCGGTGAAGGAATTCCGCCTTCGCGCGGAACG-3'   |
| PhrdB-down   | 5'-GGCGGAGCGGCAAGGGCCATCCATGGACAACCTCTCGGAACGTTG-3' |
| Pvk1         | 5'-AAGCTTTGGGACGAGGGTCAGTGGGA-3'                    |
| Pvk2         | 5'-CATATGATGAACGCGCTGGTGGCAG-3'                     |
| Pvp1         | 5'-TGTGCCACACGCCATTC-3'                             |
| Pvp2         | 5'-GCAGCATCAAGCCGGTTCTCA-3'                         |
